# Supplementary material for: Concomitant dimorphism and helical self-assembly in a C2h-symmetric ‘locked’ cyclitol
Source: Royal Society of Chemistry journal article supplement (doi:10.1039/b506591g), 2005-01-01
Supplement: b506591g.pdf [file b506591g.pdf]

## **Supplementary Information**

### **Concomitant dimorphism and helical self-assembly in a $C_{2h}$ -symmetric 'locked' cyclitol**

Goverdhan Mehta,\* Saikat Sen , Kailasam Venkatesan

*Department of Organic Chemistry, Indian Institute of Science, Bangalore 560012, India.*

## CONTENTS

|                                                                                                    | <u>Page</u> |
|----------------------------------------------------------------------------------------------------|-------------|
| Crystal data for the $\alpha$ - and $\beta$ - forms of tetrol <b>1</b> , and tetrol <b>2</b> ..... | 3           |
| ORTEP diagrams and the atom numbering schemes.....                                                 | 4           |
| Relevant torsion angles.....                                                                       | 6           |
| List of the intra- and intermolecular interactions.....                                            | 9           |
| DSC characteristics.....                                                                           | 10          |
| Packing diagrams of the $\alpha$ -form.....                                                        | 12          |
| Packing diagrams of the $\beta$ -form.....                                                         | 14          |
| Comparison of the cooperative hydrogen bonding networks in the dimorphs.....                       | 16          |

**Table 1. Crystal data for the  $\alpha$ - and  $\beta$ - forms of tetrol 1, and tetrol 2**

|                                                                                   | $\alpha$ - form                                | $\beta$ - form                                 | 2                                              |
|-----------------------------------------------------------------------------------|------------------------------------------------|------------------------------------------------|------------------------------------------------|
| <b>Molecular formula</b>                                                          | C <sub>14</sub> H <sub>20</sub> O <sub>4</sub> | C <sub>14</sub> H <sub>20</sub> O <sub>4</sub> | C <sub>14</sub> H <sub>24</sub> O <sub>4</sub> |
| <b>Molecular weight</b>                                                           | 252.3                                          | 252.3                                          | 256.4                                          |
| <b>Crystal system</b>                                                             | Tetragonal                                     | Triclinic                                      | Triclinic                                      |
| <b>Cell dimensions</b>                                                            |                                                |                                                |                                                |
| <b>a (Å)</b>                                                                      | 6.780 (1)                                      | 9.821 (2)                                      | 5.958(5)                                       |
| <b>b (Å)</b>                                                                      | 6.780 (1)                                      | 9.926 (2)                                      | 5.994(5)                                       |
| <b>c (Å)</b>                                                                      | 27.425 (7)                                     | 13.927 (3)                                     | 9.867(8)                                       |
| <b><math>\alpha</math> (°)</b>                                                    | 90.00                                          | 92.912 (3)                                     | 86.17(1)                                       |
| <b><math>\beta</math> (°)</b>                                                     | 90.00                                          | 101.065 (3)                                    | 82.55(1)                                       |
| <b><math>\gamma</math> (°)</b>                                                    | 90.00                                          | 91.848 (4)                                     | 73.20(1)                                       |
| <b>V (Å<sup>3</sup>)</b>                                                          | 1260.74 (4)                                    | 1256.40 (9)                                    | 334.3(1)                                       |
| <b>Z</b>                                                                          | 4                                              | 4                                              | 1                                              |
| <b>Space group</b>                                                                | P4 <sub>1</sub>                                | P-1                                            | P-1                                            |
| <b>Calc. Density (g cm<sup>-3</sup>)</b>                                          | 1.33                                           | 1.33                                           | 1.27                                           |
| <b>F<sub>000</sub></b>                                                            | 543.9                                          | 543.9                                          | 140.0                                          |
| <b><math>\mu</math> (mm<sup>-1</sup>)</b>                                         | 0.10                                           | 0.10                                           | 0.09                                           |
| <b>2<math>\theta</math> range</b>                                                 | 3.0 – 27.3                                     | 1.5 – 25.4                                     | 2.1 – 25.4                                     |
| <b><math>h</math> min,max; <math>k</math> min,max; <math>l</math> min,max</b>     | -8, 8; -8, 8; -33,<br>34                       | -11, 11; -11, 11;<br>-16, 16                   | -7, 7; -6, 7; -11,<br>11                       |
| <b>Total no. of reflections</b>                                                   | 12972                                          | 12479                                          | 2431                                           |
| <b>Unique reflections</b>                                                         | 1450                                           | 4580                                           | 1213                                           |
| <b>No. of parameters</b>                                                          | 243                                            | 485                                            | 84                                             |
| <b>R, R<sub>w</sub></b>                                                           | 0.0422, 0.0986                                 | 0.0519, 0.1458                                 | 0.0504, 0.1471                                 |
| <b>GooF</b>                                                                       | 1.224                                          | 1.021                                          | 1.058                                          |
| <b><math>\Delta\rho_{\min}</math>, <math>\rho_{\max}</math> (eÅ<sup>-3</sup>)</b> | -0.16, 0.25                                    | -0.22, 0.47                                    | -0.20, 0.32                                    |

## ORTEP DIAGRAMS AND ATOM NUMBERING SCHEMES

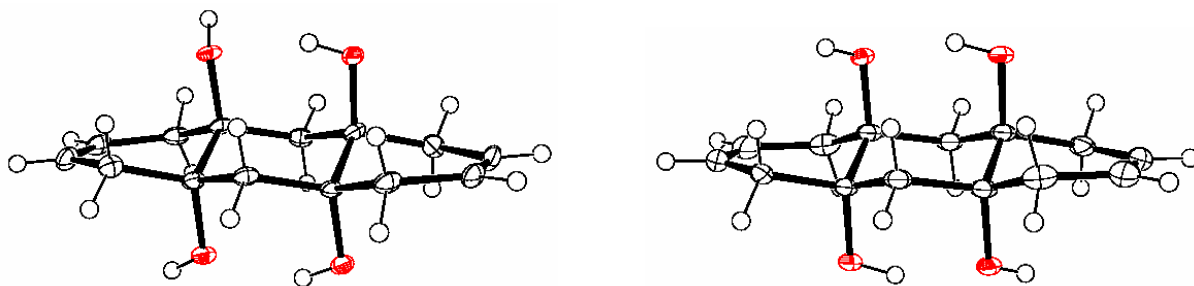

ORTEP diagrams of the  $\alpha$ -form (*left*) and the  $\beta$ -form (*right*) at 100 K with 50% ellipsoid probability

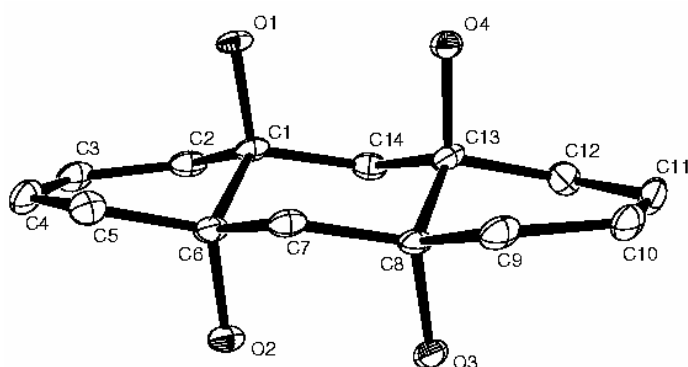

Atom numbering of the asymmetric unit in the  $\alpha$ -form (the hydrogen atoms have been excluded for clarity)

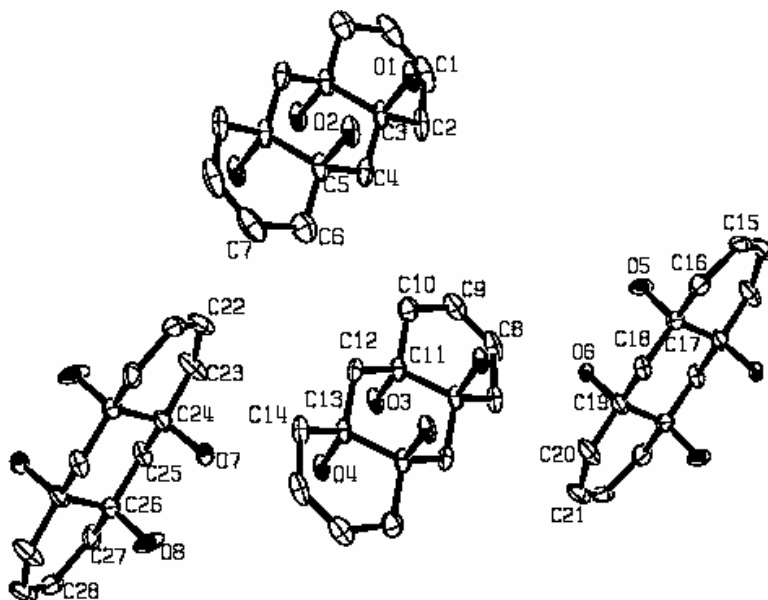

Atom numbering of the asymmetric unit in the  $\beta$ -form (the hydrogen atoms have been excluded for clarity)

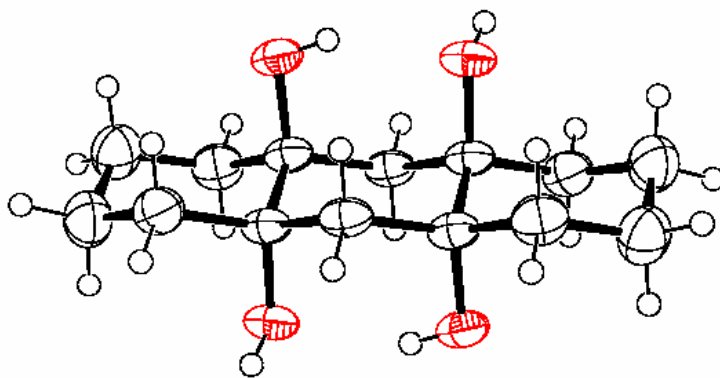

ORTEP diagrams of tetrol **2** at 292 K with 50% ellipsoid probability

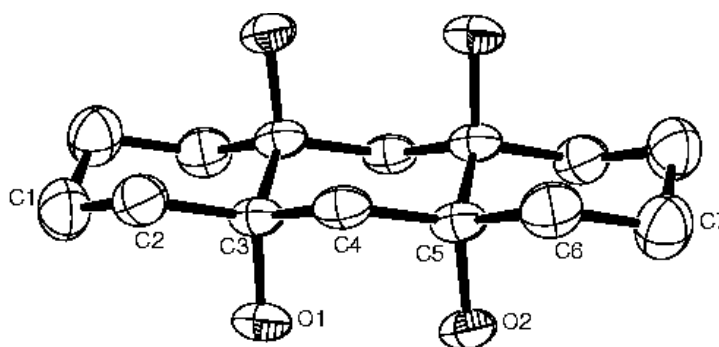

Atom numbering of the asymmetric unit in tetrol **2**  
(the hydrogen atoms have been excluded for clarity)

**Table 2. Relevant torsion angles in the  $\alpha$ - form**

|                           | Angle (°) | s. u. |                           | Angle (°) | s. u. |
|---------------------------|-----------|-------|---------------------------|-----------|-------|
| <b>O1 -C1 -C6 -O2</b>     | -179.67   | 0.14  | <b>C14 -C1 -C2 -C3</b>    | 164.60    | 0.16  |
| <b>O1 -C1 -C6 -C7</b>     | -65.48    | 0.19  | <b>O2 -C6 -C7 -C8</b>     | 61.68     | 0.20  |
| <b>O1 -C1 -C6 -C5</b>     | 58.50     | 0.19  | <b>C1 -C6 -C7 -C8</b>     | -55.52    | 0.21  |
| <b>C14 -C1 -C6 -O2</b>    | -61.64    | 0.20  | <b>C5 -C6 -C7 -C8</b>     | -178.93   | 0.16  |
| <b>C14 -C1 -C6 -C7</b>    | 52.56     | 0.21  | <b>O2 -C6 -C5 -C4</b>     | -73.49    | 0.21  |
| <b>C14 -C1 -C6 -C5</b>    | 176.53    | 0.16  | <b>C1 -C6 -C5 -C4</b>     | 47.62     | 0.22  |
| <b>C2 -C1 -C6 -O2</b>     | 62.22     | 0.20  | <b>C7 -C6 -C5 -C4</b>     | 170.74    | 0.16  |
| <b>C2 -C1 -C6 -C7</b>     | 176.41    | 0.16  | <b>C1 -C14 -C13 -O4</b>   | -63.85    | 0.20  |
| <b>C2 -C1 -C6 -C5</b>     | -59.62    | 0.21  | <b>C1 -C14 -C13 -C12</b>  | 178.19    | 0.16  |
| <b>O1 -C1 -C14 -C13</b>   | 59.99     | 0.20  | <b>C1 -C14 -C13 -C8</b>   | 55.30     | 0.21  |
| <b>C2 -C1 -C14 -C13</b>   | -177.47   | 0.16  | <b>C6 -C7 -C8 -C13</b>    | 56.29     | 0.21  |
| <b>O1 -C1 -C2 -C3</b>     | -73.07    | 0.20  | <b>C6 -C7 -C8 -C9</b>     | 179.02    | 0.16  |
| <b>C6 -C1 -C2 -C3</b>     | 41.42     | 0.22  | <b>O4 -C13 -C12 -C11</b>  | 72.60     | 0.21  |
| <b>C5 -C4 -C3 -C2</b>     | 0.95      | 0.32  | <b>C14 -C13 -C12 -C11</b> | -167.66   | 0.17  |
| <b>C4 -C3 -C2 -C1</b>     | -13.09    | 0.29  | <b>C8 -C13 -C12 -C11</b>  | -44.76    | 0.23  |
| <b>C12 -C11 -C10 -C9</b>  | -1.97     | 0.34  | <b>O4 -C13 -C8 -O3</b>    | -173.32   | 0.14  |
| <b>C12 -C13 -C8 -C9</b>   | 58.87     | 0.20  | <b>O4 -C13 -C8 -C7</b>    | 65.83     | 0.19  |
| <b>C10 -C9 -C8 -O3</b>    | 72.84     | 0.20  | <b>O4 -C13 -C8 -C9</b>    | -57.25    | 0.19  |
| <b>C10 -C9 -C8 -C7</b>    | -166.33   | 0.17  | <b>C14 -C13 -C8 -O3</b>   | 66.90     | 0.19  |
| <b>C10 -C9 -C8 -C13</b>   | -43.96    | 0.22  | <b>C14 -C13 -C8 -C7</b>   | -53.95    | 0.20  |
| <b>C8 -C9 -C10 -C11</b>   | 16.12     | 0.29  | <b>C14 -C13 -C8 -C9</b>   | -177.03   | 0.16  |
| <b>C6 -C5 -C4 -C3</b>     | -18.87    | 0.28  | <b>C12 -C13 -C8 -O3</b>   | -57.19    | 0.20  |
| <b>C13 -C12 -C11 -C10</b> | 17.13     | 0.30  | <b>C12 -C13 -C8 -C7</b>   | -178.05   | 0.16  |

**Table 3. Relevant torsion angles in the  $\beta$ - form**

|                           | Angle (°) | s. u. |                           | Angle (°) | s. u. |
|---------------------------|-----------|-------|---------------------------|-----------|-------|
| <b>C3 -C4 -C5 -O2</b>     | -62.72    | 0.19  | <b>C11 -C12 -C13 -O4</b>  | -60.26    | 0.19  |
| <b>C3 -C4 -C5 -C6</b>     | 177.86    | 0.16  | <b>C11 -C12 -C13 -C14</b> | 177.80    | 0.15  |
| <b>C5 -C4 -C3 -O1</b>     | 64.17     | 0.20  | <b>C13 -C12 -C11 -O3</b>  | 63.82     | 0.19  |
| <b>C5 -C4 -C3 -C2</b>     | -177.60   | 0.16  | <b>C13 -C12 -C11 -C10</b> | -177.99   | 0.15  |
| <b>C19 -C18 -C17 -O5</b>  | 61.10     | 0.21  | <b>C9 -C10 -C11 -O3</b>   | -69.55    | 0.19  |
| <b>C19 -C18 -C17 -C16</b> | -178.74   | 0.17  | <b>C9 -C10 -C11 -C12</b>  | 170.48    | 0.16  |
| <b>C17 -C18 -C19 -O6</b>  | -58.15    | 0.21  | <b>C11 -C10 -C9 -C8</b>   | -19.27    | 0.28  |
| <b>C17 -C18 -C19 -C20</b> | 178.17    | 0.17  | <b>C26 -C25 -C24 -O7</b>  | 63.62     | 0.21  |
| <b>O5 -C17 -C16 -C15</b>  | -69.23    | 0.22  | <b>C26 -C25 -C24 -C23</b> | -178.24   | 0.17  |
| <b>C18 -C17 -C16 -C15</b> | 168.95    | 0.18  | <b>C24 -C25 -C26 -O8</b>  | -58.81    | 0.21  |
| <b>C7 -C6 -C5 -O2</b>     | 72.77     | 0.22  | <b>C24 -C25 -C26 -C27</b> | 179.55    | 0.16  |
| <b>C7 -C6 -C5 -C4</b>     | -171.20   | 0.18  | <b>C28 -C27 -C26 -O8</b>  | 71.51     | 0.23  |
| <b>C1 -C2 -C3 -O1</b>     | -75.02    | 0.20  | <b>C28 -C27 -C26 -C25</b> | -169.81   | 0.18  |
| <b>C1 -C2 -C3 -C4</b>     | 164.40    | 0.17  | <b>C25 -C24 -C23 -C22</b> | 164.32    | 0.19  |
| <b>O6 -C19 -C20 -C21</b>  | 71.80     | 0.23  | <b>C18 -C19 -C20 -C21</b> | -165.29   | 0.18  |

**Table 4. Relevant torsion angles in the tetrol 2**

|                       | Angle (°) | s. u. |
|-----------------------|-----------|-------|
| <b>C5 -C4 -C3 -O1</b> | 61.45     | 0.17  |
| <b>C5 -C4 -C3 -C2</b> | -179.14   | 0.14  |
| <b>C3 -C4 -C5 -O2</b> | -61.72    | 0.17  |
| <b>C3 -C4 -C5 -C6</b> | 179.04    | 0.14  |
| <b>O1 -C3 -C2 -C1</b> | -59.94    | 0.19  |
| <b>C4 -C3 -C2 -C1</b> | 179.57    | 0.15  |
| <b>O2 -C5 -C6 -O7</b> | 58.84     | 0.19  |
| <b>C4 -C5 -C6 -C7</b> | 179.39    | 0.15  |



**Table 5. Intra- and Intermolecular interactions in the  $\alpha$ - form**

| D-H...A      | D-H (Å)  | D...A (Å) | H...A (Å) | $\angle$ D-H...A (°) | Symmetry           |
|--------------|----------|-----------|-----------|----------------------|--------------------|
| O3-H3O...O2  | 0.80 (3) | 2.602 (2) | 1.88 (3)  | 149 (3)              | x, y, z            |
| O4-H4O...O1  | 0.81 (3) | 2.690 (2) | 1.95 (3)  | 152 (2)              | x, y, z            |
| O2-H2O...O4  | 0.87 (3) | 2.702 (2) | 1.84 (3)  | 167 (2)              | x + 1, y, z        |
| O1-H1O...O3  | 0.92 (3) | 2.722 (2) | 1.82 (3)  | 167 (3)              | -y, x, z + 1/4     |
| C10-H10...O1 | 0.94 (3) | 3.551 (2) | 2.71 (3)  | 149 (2)              | y - 1, -x, z - 1/4 |
| C9-H9A...O2  | 0.94 (2) | 3.382 (3) | 2.79 (2)  | 123 (2)              | x - 1, y, z        |
| C2-H2B...O4  | 0.91 (2) | 3.320 (2) | 2.78 (2)  | 119 (2)              | x + 1, y, z        |

**Table 6. Intra- and Intermolecular interactions in the  $\beta$ - form**

| D-H...A       | D-H (Å)  | D...A (Å) | H...A (Å) | $\angle$ D-H...A (°) | Symmetry               |
|---------------|----------|-----------|-----------|----------------------|------------------------|
| O1-H1O...O2   | 0.85 (2) | 2.630 (2) | 1.85 (2)  | 152 (2)              | x, y, z                |
| O5-H5O...O6   | 0.84 (3) | 2.641 (2) | 1.87 (3)  | 152 (3)              | x, y, z                |
| O3-H3O...O4   | 0.82 (2) | 2.682 (2) | 1.94 (2)  | 150 (2)              | x, y, z                |
| O7-H7O...O8   | 0.87 (3) | 2.595 (2) | 1.80 (3)  | 150 (3)              | x, y, z                |
| O4-H4O...O7   | 0.89 (3) | 2.747 (2) | 1.87 (3)  | 169 (2)              | x, y, z                |
| O2-H2O...O3   | 0.73 (2) | 2.801 (2) | 2.09 (2)  | 167 (2)              | x, y+1, z              |
| O8-H8O...O5   | 0.82 (3) | 2.576 (3) | 1.77 (3)  | 169 (3)              | x + 1, y, z + 1        |
| O6-H6O...O1   | 0.85 (3) | 2.734 (2) | 1.90 (3)  | 168 (3)              | x, y - 1, z            |
| C14-H14A...O2 | 0.94 (2) | 3.248 (3) | 2.57 (2)  | 129 (2)              | -x + 2, -y + 2, -z + 1 |
| C2-H2B...O3   | 0.98 (2) | 3.172 (3) | 2.49 (2)  | 126 (2)              | -x + 1, -y + 1, -z + 1 |
| C14-H14B...O7 | 1.00 (2) | 3.465 (3) | 2.70 (2)  | 133 (1)              | x, y, z                |
| C2-H2A...O6   | 1.00 (2) | 3.398 (3) | 2.65 (2)  | 131 (2)              | x, y + 1, z            |

**Table 7. Intra- and Intermolecular interactions in tetrol 2**

| D-H...A    | D-H (Å) | D...A (Å) | H...A (Å) | $\angle$ D-H...A (°) | Symmetry       |
|------------|---------|-----------|-----------|----------------------|----------------|
| O2-H2...O1 | 0.82    | 2.670 (3) | 1.94      | 148                  | x, y, z        |
| O1-H1...O2 | 0.82    | 2.814 (3) | 2.01      | 167                  | -x, -y, -z + 1 |

## DSC characteristics

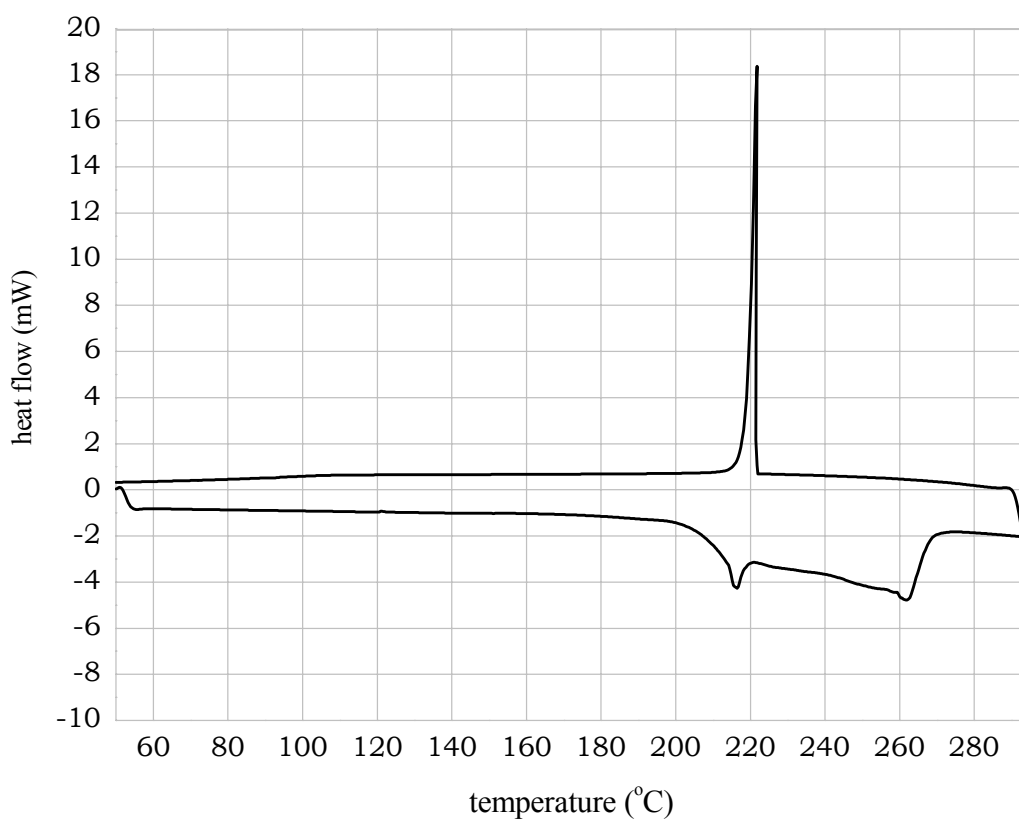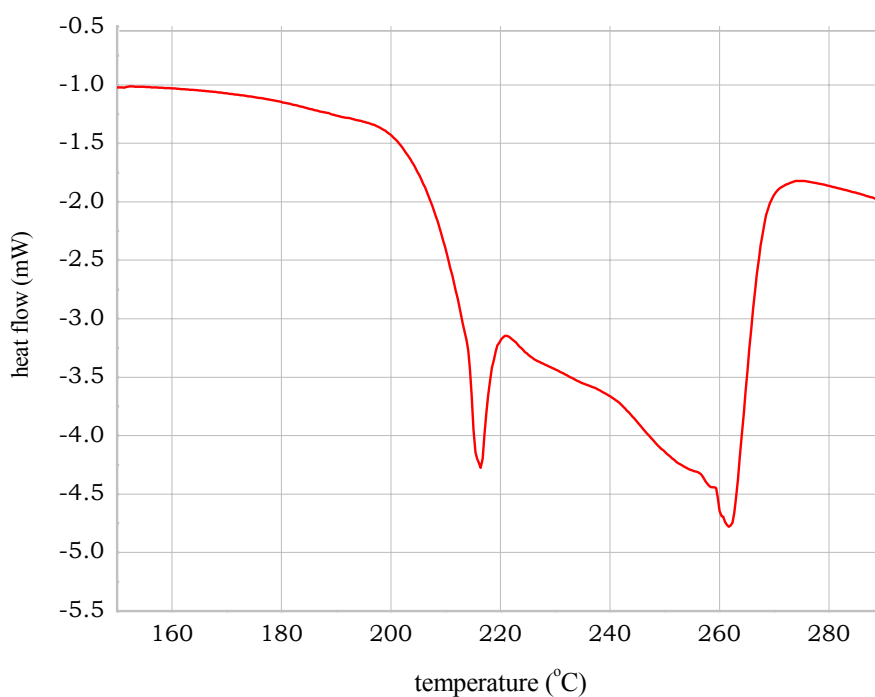

DSC plots for the  $\alpha$ - form, showing the heating and cooling curves (*top*). A magnified view of the unique melting endotherm has also been shown (*bottom*); the enthalpy change for the transition =  $-51.52 \text{ kJmol}^{-1}$ .

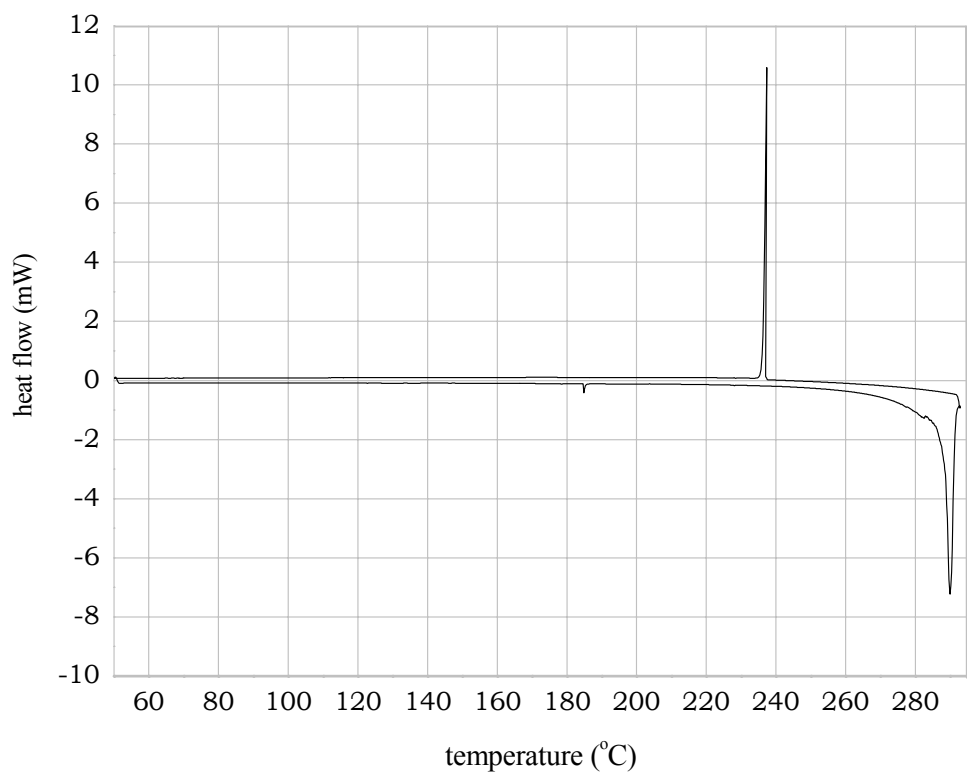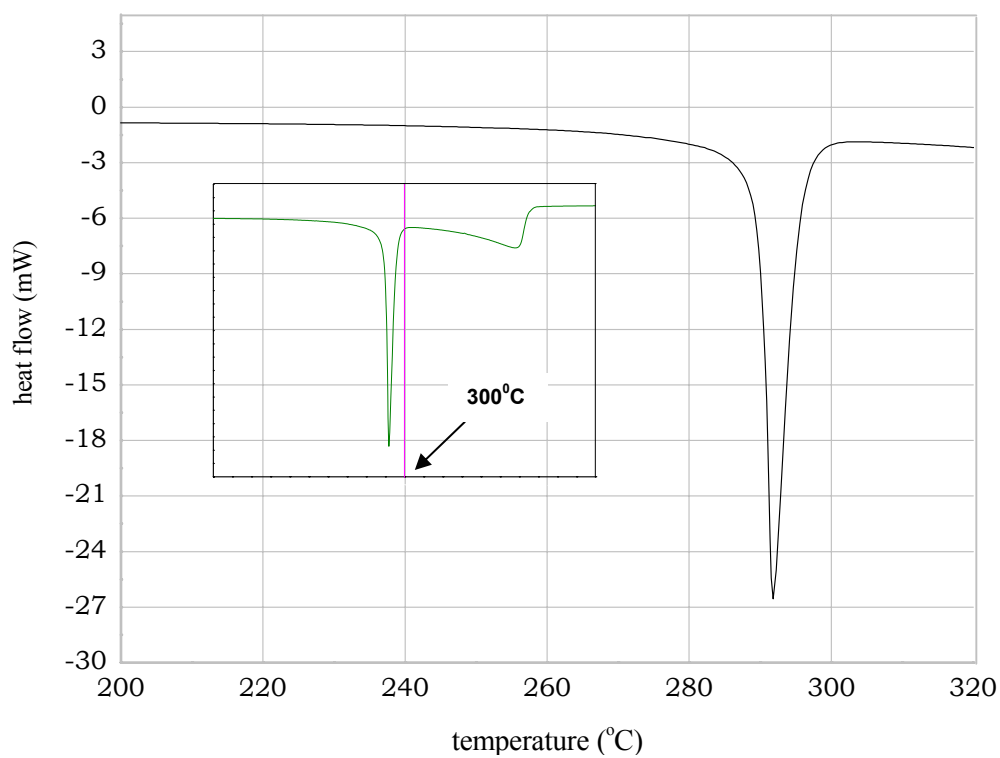

DSC plots for the b-form, showing the heating and cooling curves (*top*). The compound decomposes on melting (*inset, bottom*), so that to determine the enthalpy of transition, a single heating run (*bottom*) was performed. The enthalpy change corresponds to  $-40.08 \text{ kJmol}^{-1}$ .

## Packing diagrams of the $\alpha$ -form

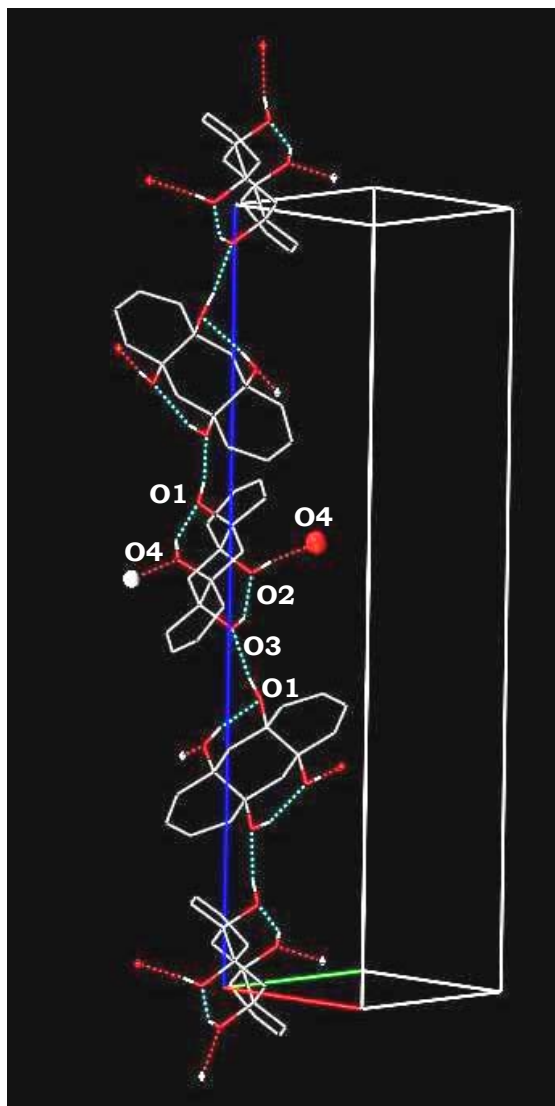

The O-H...O hydrogen bonded helical assembly. The non-interacting hydrogen atoms have been removed for clarity.

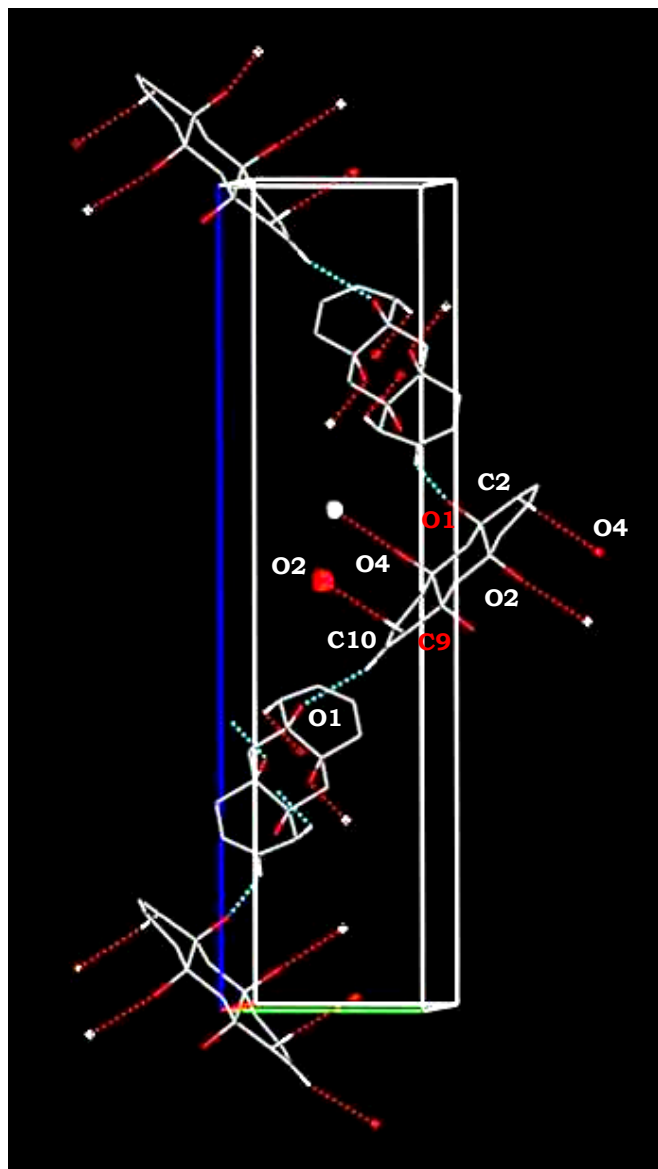

The helical assembly mediated by C-H...O intermolecular interactions. The non-interacting hydrogen atoms have been removed for clarity.

## Packing diagrams of the $\beta$ -form

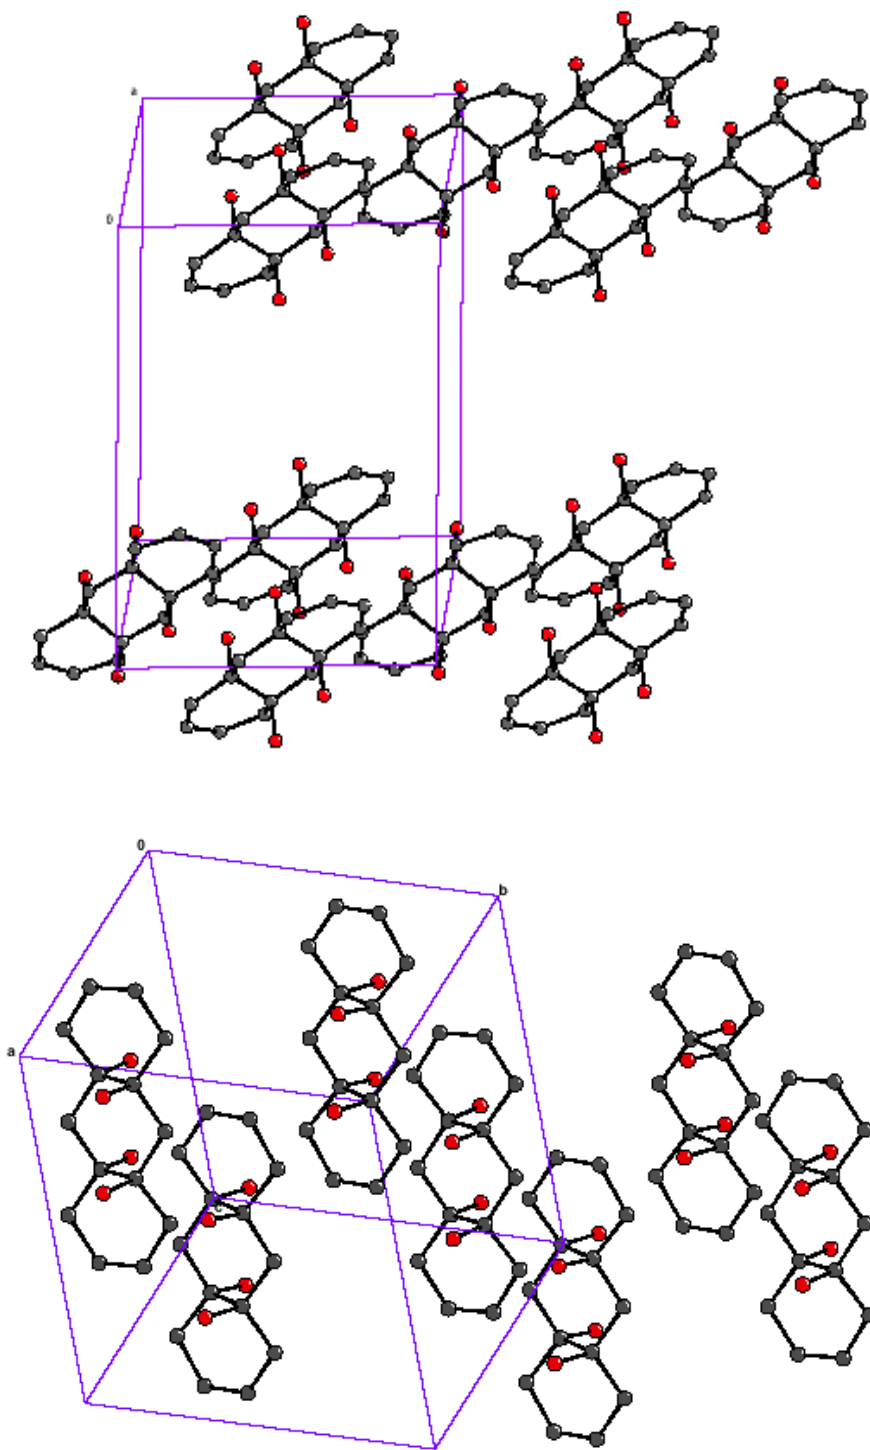

**Molecular packing diagram of the  $\beta$ - form, showing the arrangement of the A- (*top*) and B-type molecules (*bottom*) in the unit cell.** Note that the centroids of the A-type molecules lie at  $(0.5, 0, 0)$  and  $(0, 0.5, 0)$ , while those of the B-type lie at  $(0, 0.5, 0.5)$  and  $(0.5, 0, 0.5)$ , so that the two sets of molecules are organized in two layers parallel to the  $ab$  plane. The hydrogen atoms have been removed for clarity.

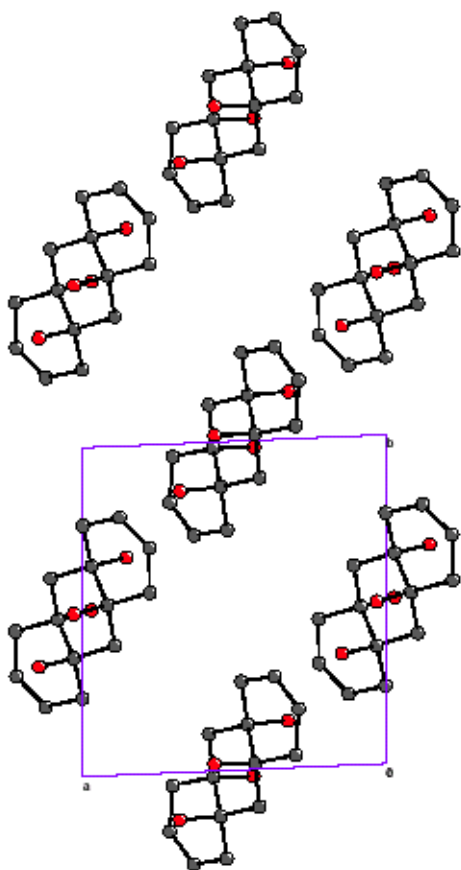

Molecular packing diagram of the  $\beta$ - form, showing the organization of the A-type molecules as seen down the  $c$ -direction. The hydrogen atoms have been removed for clarity.

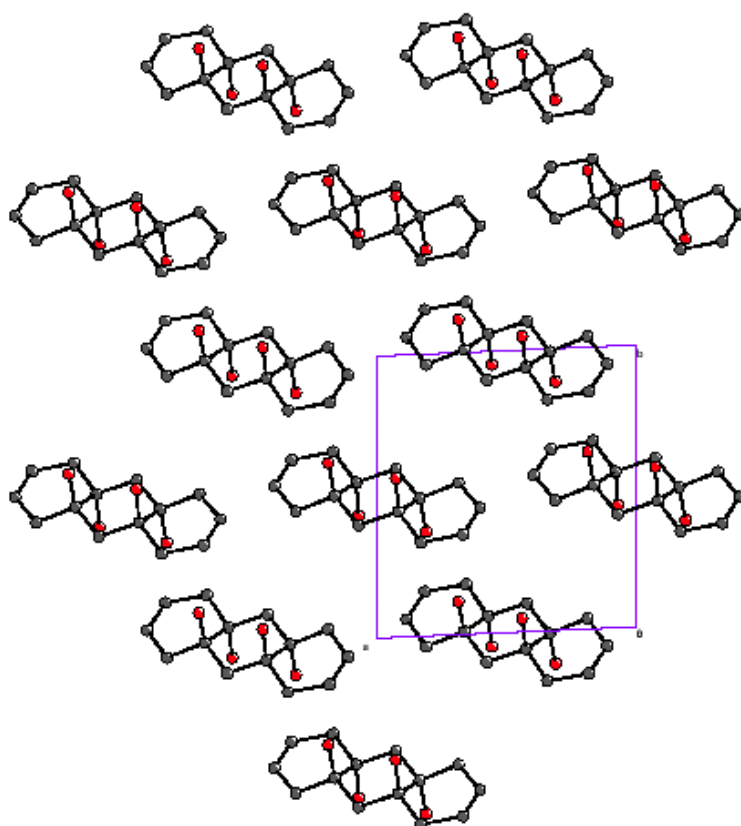

Molecular packing diagram of the  $\beta$ - form, showing the organization of the B-type molecules as seen down the  $c$ -direction. The hydrogen atoms have been removed for clarity.

Comparison of the cooperative hydrogen bonding networks in the dimorphs of 1

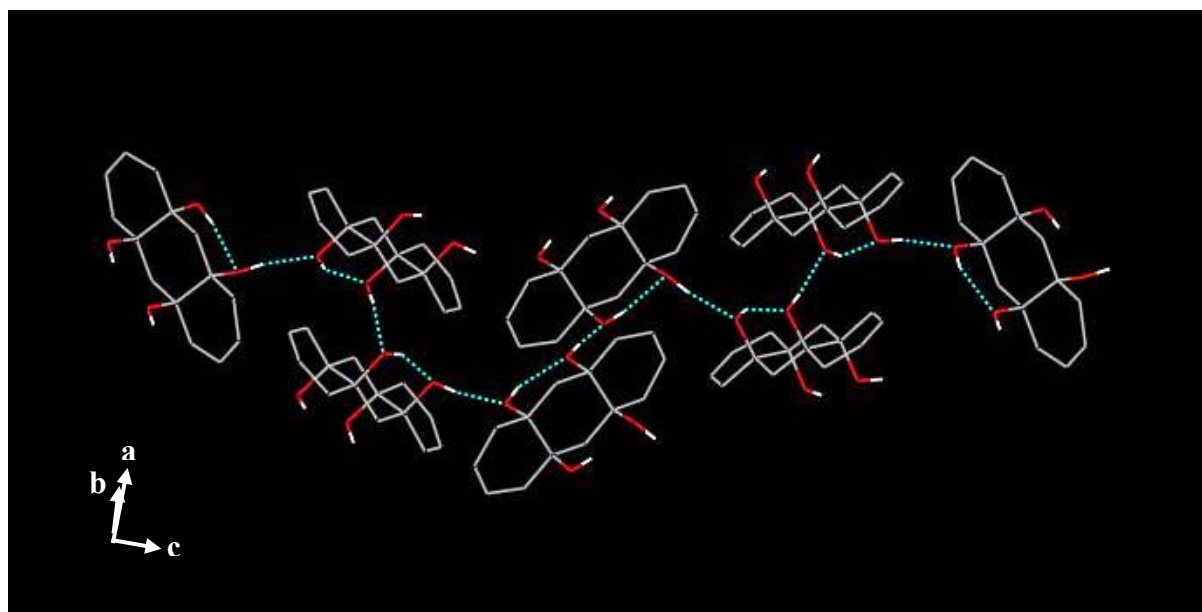

The cooperative hydrogen bonding network in the  $\alpha$ -form of **1**

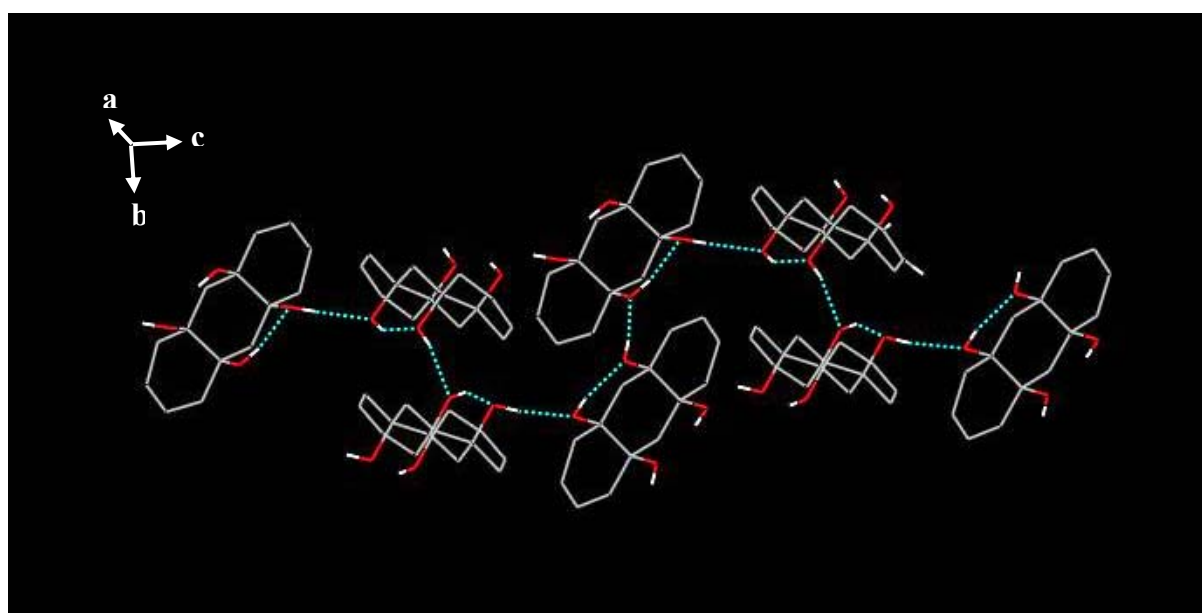

The cooperative hydrogen bonding network in the  $\beta$ -form of **1**
